# Supplementary material
Source: publisher figshare collection journal article supplement (https://gsapubs.figshare.com/ndownloader/files/36502911)
Supplement: Supplementary file 1 [file 36502911]

## Sheet: FHDP-1A
Sample ID	Drillers Depth (m)	Actual Depth (m)	Top Depth (m)	Facies	Colour (Munsell)	Moisture (%)	Organics (%)	Grain Size	Sample Type	Textural Group	Mud (%)	Sand (%)	XRF Data	Mg	Al	Si	K	Ca (G)	Ca (S)	Ti (G)	Ti (S)	Fe (G)	Fe (S)	Sr (G)	Sr (S)	Ba	Ti/Al	Ca/Ti
1A-C1-1	1.83 - 1.87	1.16-1.2	1.16	Diamict	pale yellow	14.0991			Polymodal, v. poorly sorted	Muddy Sand	33.6	66.4		21735.1	71143.6	244850	6933.26	24330.3	14473.9	5108.63	3743.03	45142.8	40516.4	118.519	92.9717	206.411	5.26123	6.50016
1A-C1-2	2.77 - 2.82	2.1-2.15	2.1	Diamict	pale yellow	6.59644			Polymodal, v. poorly sorted	Muddy Sand	28.7	71.3		28301.2	67282	252814	8427.89	27858	16143.9	3749.79	2843.39	45106.6	40291.9	116.195	81.3503	261.049	4.22607	9.79746
1A-C2-1	3.36 -3.41	2.69-2.74	2.69	Diamict	pale yellow	8.17472			Bimodal, v. poorly sorted	Muddy Sand	21.1	78.9		19799.9	62551.3	267370	6390.15	29555.5	16555.8	4344.15	2936.04	37177.4	31428.2	108.061	81.3503	196.871	4.69381	10.0665
1A-C3-1	4.13 - 4.18	3.46-3.51	3.46	Cross stratified sandstone	light brownish grey	9.0445			Unimodal, poorly sorted	Sand	8.5	91.5		23341.5	55994.8	264991	4425.17	38093.2	23248	3749	2785	53601	49792	93	67.6224	164.035	4.97367	13.678
1A-C3-2	4.82 - 4.88	4.15-4.21	4.15	Diamict	pale yellow	4.61393			Trimodal, v. poorly sorted	Muddy Sand	26.7	73.3		16631.1	57660.4	274647	5171.39	37052	20816.5	4310.96	3008.77	39135.5	33101.7	117.357	84.6707	179.525	5.21809	12.3147
1A-C4-1	6.22 - 6.27	5.55-5.6	5.55	Diamict	light grey	3.63277			Polymodal, v. poorly sorted	Muddy Sand	27.8	72.2		15842.6	54679.8	274217	7192.96	22863.6	12274.1	2810.01	2053.34	28954.4	23102.4	87.1463	66.4084	169.118	3.7552	11.1349
1A-C5-1	7.29 - 7.34	6.62-6.67	6.62	Sandstone	light brownish grey	7.5847			Unimodal, poorly sorted	Muddy Sand	0	100		20380.7	58980.3	245953	6458.45	33247.6	19294	3642	2707	43151	38229	93	67	218	4.58967	12.2821
1A-C6-1	15.84 - 15.88	15.17-15.21	15.17	Sandstone	dark olive brown	6.60578	8.18		Polymodal, v. poorly sorted	Muddy Sand	49.9	50.1		0	53163.7	241026	6631.07	16194	8330	3217	2381	17457	13021	104	92	238	4.47862	6.80135
1A-C6-2	15.98 - 16.02	15.31-15.35	15.31	Mudstone and fine-sandy mudstone	brown	5.47348			Polymodal, poorly sorted	Mud	98.6	1.4		4394.02	77860.4	259026	9344.67	7779.35	5133	3591	2801	23073	17944	99	81	283	3.59746	2.77735
1A-C6-3	16.16 - 16.20	15.49-15.53	15.49	Mudstone and fine-sandy mudstone	brown	10.0231	8.57		Trimodal, v. poorly sorted	Sandy Mud	63.6	36.4		0	39824.6	270266	5986	15340.6	7988	2687	1937	20004	15245	101	94	183	4.86382	7.91977
1A-C6-4	16.34 - 16.38	15.67-15.71	15.67	Sandstone	dark greyish brown	4.40384			Polymodal, v. poorly sorted	Muddy Sand	37.5	62.5		4562.8	59255	261822	9397.44	18062.6	9824	3104	2314	25802	20315	121	96	251	3.90516	7.80581
1A-C6-5	16.60-16.67	15.93-16.00	15.93	Diamict	olive yellow	3.47041			Polymodal, v. poorly sorted	Muddy Sand	27.2	72.8		16874.3	67593.6	258407	6509.77	31251.1	18082.4	4315.11	3402.3	46412.4	41575.3	120.843	87.9911	210.747	5.03346	9.18528
1A-C7-1	17.80 - 17.85	17.13-17.18	17.13	Diamict	light olive grey	9.77012			Polymodal, v. poorly sorted	Muddy Sand	32.2	67.8		13269.2	59058.1	258510	7505.47	20691.6	11858.3	3671.99	2769.66	40785	35549.7	98.7658	74.7094	180.393	4.68973	7.47081
1A-C8-1	18.55-18.60	17.88-17.93	17.88	Diamict	light yellowish brown	5.4057			Polymodal, v. poorly sorted	Muddy Sand	34	66		16438	62032.7	257482	9200.53	21083.6	12123.5	3961.4	3164.19	42303.5	37146.4	104.576	79.6901	222.022	5.10084	6.66318
1A-C9-1	19.56-19.61	18.89-18.94	18.89	Diamict	light olive brown	5.01883			Polymodal, v. poorly sorted	Muddy Sand	33.5	66.5		11454.9	62823.1	263981	6793.17	17190.5	9987.41	3996.66	3012.76	37230.6	31725.6	81.3366	63.088	189.065	4.79562	5.70589
1A-C10-1	20.42-20.46	19.75-19.79	19.75	Cross stratified sandstone	light grey	10.1421	1.08		Polymodal, v. poorly sorted	Muddy Sand	34.2	65.8		10014.4	56581	296507	6756.13	22132.6	11867.8	3360.4	2403.34	30303.8	24331.9	98.0218	75.6797	220.145	4.2476	9.20911
1A-C10-2	20.88-20.93	20.21-20.26	20.21	Diamict	olive grey	7.30947			Trimodal, v. poorly sorted	Muddy Sand	43.3	56.7		4342.01	64745.5	260010	6555.02	14147.1	8112.22	3260.19	2506.64	33878.4	27980.3	77.8507	63.9181	187.331	3.87154	5.64383
1A-C11-1	21.40 - 21.45	20.73-20.78	20.73	Diamict	grey	10.0265			Polymodal, v. poorly sorted	Muddy Sand	36.9	63.1		4831.34	63498.1	283666	6720.97	15021.4	8223.48	3766.39	2694.94	27671	21920.8	81.3366	65.5783	208.145	4.24413	5.57392
1A-C12-1	22.02 - 22.07	21.35-21.4	21.35	Diamict	greyish brown	7.37769			Polymodal, v. poorly sorted	Muddy Sand	40.6	59.4		7535.88	67602.6	264284	7940.81	16109.8	9184.58	3276.79	2687.97	33776.2	28027.2	89.4702	71.389	207.278	3.97613	5.99332
1A-C13-1	23.12 - 23.17	22.45-22.5	22.45	Diamict	olive grey	6.68976			Polymodal, v. poorly sorted	Muddy Sand	35.5	64.5		14354	67096.9	248350	5834.11	19407.7	11253	3459.35	2682.99	41573.5	36661.4	85.9844	69.7288	174.322	3.99868	7.2336
1A-C13-2	23.59 - 23.63	22.92-22.96	22.92	Diamict	light grey	16.8032			Bimodal, poorly sorted	Mud	99.7	0.3		12284.7	68435.8	242346	12901	17946.9	11486.6	2982.2	2924.09	55791.1	53978.7	123.167	97.9524	338.236	4.27274	6.1376
1A-C14-1	24.43 - 24.48	23.76-23.81	23.76	Diamict	light olive grey	6.44844			Bimodal, poorly sorted	Muddy Sand	16.3	83.7		13668.6	60002.8	269316	5123.98	21450	12004.6	3474.91	2589.34	37643.5	31823.4	73.2029	53.9568	161.313	4.31536	8.28398
1A-C15-1	25.37 - 25.42	24.7-24.75	24.7	Diamict	olive grey	7.44898			Polymodal, v. poorly sorted	Muddy Sand	19.8	80.2		9455.65	67808.3	285441	7515.09	18627.1	10228.3	3167.7	2371.51	33248.4	27523	77.6221	55.4752	181.452	3.49738	7.85451
1A-C16-1	26.06 - 26.11	25.39-25.44	25.39	Diamict	grey	5.79569			Bimodal, v. poorly sorted	Muddy Sand	24.4	75.6		18881.4	75295.9	257987	5962.07	38309.6	22421	3865.34	3102.28	54260.3	50422.6	121.138	86.575	235.445	4.12012	12.3488
1A-C17-1	27.07 - 27.12	26.4-26.45	26.4	Diamict	grey	9.83784			Unimodal, poorly sorted	Muddy Sand	12.5	87.5		9752.96	59200.2	281811	4009.71	24342	14436	10116.3	6577.91	48526.7	43729.9	70.5656	54.6347	162.864	11.1113	3.70057
1A-C18-1	27.81-27.86	27.14-27.19	27.14	Diamict	light olive grey	8.36931			Bimodal, poorly sorted	Muddy Sand	14	86		15921.1	65631.6	258213	5437.18	28846.3	15880.2	3757.14	2432.24	40152.4	33557.3	103.496	75.648	195.614	3.70591	11.86
1A-C19-1	28.85-28.90	28.18-28.23	28.18	Diamict	grey	5.64885			Polymodal, v. poorly sorted	Muddy Sand	32.3	67.7		13711.9	72175.5	250389	6532.41	27317.4	15422.1	4482.6	3521.43	45926.6	40792.3	117.609	85.7344	208.006	4.87898	7.75747
1A-C20-1	29.95-30.00	29.28-29.33	29.28	Diamict	light grey	8.32093			Polymodal, v. poorly sorted	Muddy Sand	23.9	76.1		20727.9	67354.2	271575	6725.05	38767.2	21436.8	3302.7	2560.68	46619	41091.5	134.075	96.6614	200.924	3.80181	15.1394
1A-C21-1	30.76-30.81	30.09-30.14	30.09	Diamict	light grey	5.48447			Trimodal, v. poorly sorted	Muddy Sand	23.2	76.8		18531.5	64370	265992	7205.57	33077.1	18676.7	3162.55	2542.76	42664	37231.4	103.496	74.8075	196.499	3.95022	13.0084
1A-C22-1	31.80-31.85	31.13-31.18	31.13	Diamict	light olive grey	5.58283			Polymodal, v. poorly sorted	Muddy Sand	32.1	67.9		16461.7	73164.6	246514	5064.89	30448.9	17799.5	4097.2	3246.64	47847.1	43178.6	112.905	88.256	180.566	4.43745	9.37858
1A-C23-1	32.59-32.67	31.92-32	31.92	Diamict	light yellowish brown	20.5707			Polymodal, v. poorly sorted	Muddy Sand	41.4	58.6		12440.2	77460.7	245300	5608.18	24719	14736	3703.56	3122.19	51923.8	47781.1	111.729	76.4886	223.053	4.03068	7.9172
1A-C24-1	33.53-33.58	32.86-32.91	32.86	Diamict	greyish brown	24.3338			Unimodal, v. poorly sorted	Muddy Sand	16.1	83.9		18183	82307.7	242764	4707.75	32465.3	19643.9	4275.47	3410.92	57945.4	55103.1	104.672	74.8075	213.316	4.1441	9.51806
1A-C24-2	33.99-34.05	33.32-33.38	33.32	Sandstone	light grey	12.7627	0.92					100		15753.2	61582.3	241201	5203.18	33012.9	18688	3790	2921	46410	41975	109	84	220	4.74325	11.3019
1A-C25-1	34.75-34.80	34.08-34.13	34.08	Basement								100

## Sheet: FHDP-1B
Sample ID	Drillers Depth (m)	Actual Depth (m)	Top Depth (m)	Facies	Colour (Munsell)	Moisture (%)	Organics (%)	Grain Size	Sample Type	Textural Group	Mud (%)	Sand (%)	XRF Data	Mg	Al	Si	K	Ca (G)	Ca (S)	Ti (G)	Ti (S)	Fe (G)	Fe (S)	Sr (G)	Sr (S)	Ba
1B-C2-1	15.39-15.44	14.72-14.77	14.72	Breccia	light olive brown	3.34336			Bimodal, v. poorly sorted	Muddy Sand	20.6	79.4		13245.8	76167.3	218148	5181.2	35849.6	20755.2	3476.74	2825.05	47674.8	42870.6	119.28	87.1962	232.572
1B-C2-2	15.62-15.66	14.95-14.99	14.95	Interstratified mudstone and sandstone	dark yellowish brown	7.1224	4.9		Polymodal, poorly sorted	Muddy Sand	40.3	59.7		0	74212.8	251120	6491.5	16111.1	8741.1	2981.53	2223.46	24012	18663.8	96.8408	74.8571	229.022
1B-C2-3	15.72-15.76	15.05-15.09	15.05	Interstratified mudstone and sandstone	very dark brown	9.43923	11.77		Bimodal, poorly sorted	Sand	9.7	90.3		6025.87	68522.2	192489	5784.39	25313	13692.8	3197.73	2484.28	23177	18183.4	133.451	108.584	208.605
1B-C2-4	15.92-15.95	15.25-15.28	15.25	Interstratified mudstone and sandstone	dark greyish brown	4.41688	4.09		Bimodal, poorly sorted	Muddy Sand	29.7	70.3		4568.73	65608.8	258938	6653.28	15667.2	8395.05	3433.5	2547.24	22404	17180.7	96.8408	73.2119	217.482
1B-C2-5	16.16-16.19	15.48-15.52	15.48	Interstratified mudstone and sandstone	greyish brown	6.55132	5.41		Polymodal, v. poorly sorted	Sandy Mud	58.4	41.6		4342.19	74342.2	251667	9582.44	11039.4	6505.76	3944.15	3061.88	24562.9	19067.1	102.746	82.2606	307.138
1B-C3-1	16.46-16.49	15.79-15.82	15.79	Interstratified mudstone and sandstone	very dark greyish brown	9.5276	10.63		Polymodal, v. poorly sorted	Muddy Sand	49.3	50.7		7218.47	51665.7	201903	7745.02	28083	14900.8	2601.63	2098.55	27138.1	21893.1	108.651	92.1319	197.953
1B-C3-2	16.68-16.72	16.01-16.05	16.01	Sandstone	dark greyish brown	4.78264			Polymodal, v. poorly sorted	Muddy Sand	32.5	67.5		5045.25	54069.6	227031	7762.63	36244.3	20187	2917	2311	30442	24920	113	94	240
1B-C3-3	16.86-16.90	16.19-16.23	16.19	Diamict	light yellowish brown	3.36301			Polymodal, v. poorly sorted	Muddy Sand	31.5	68.5		16373.5	66820.1	256615	7289.98	30138.5	17133.8	3766.41	2957.92	45784.7	40734.3	123.49	87.4155	199.154

## Sheet: FHDP-2A
Sample ID	Drillers Depth (m)	Actual Depth (m)	Top Depth (m)	Facies	Colour (Munsell)	Moisture (%)	Organics (%)	Grain Size	Sample Type	Textural Group	Mud (%)	Sand (%)	XRF Data	Mg	Al	Si	K	Ca (G)	Ca (S)	Ti (G)	Ti (S)	Fe (G)	Fe (S)	Sr (G)	Sr (S)	Ba	Ti/Al	Ca/Ti
2A-C1-1	1.55-1.59	0.88-0.92	0.88	Sandstone	light yellowish brown	14.6921	0.77		Bimodal, poorly sorted	Sand	7.4	92.6		8141	40128	306508	4917	14743	7963	1422	950	18636	13785	74	58	169	2.36742	15.5189
2A-C1-2	1.77-1.82	1.10-1.15	1.1	Mudstone and fine-sandy mudstone	pale yellow	28.8901	1.8		Polymodal, v. poorly sorted	Sandy Mud	70	30		16946.8	60939.1	233967	11038.3	31818.1	18081	3696	3247	51677	48217	135	99	263	5.32827	9.79923
2A-C1-3	2.25-2.29	1.58-1.62	1.58	Diamict	light grey	12.1848			Polymodal, v. poorly sorted	Sandy Mud	61.5	38.5		19413.5	68431.2	269796	11468.5	39218.8	21646.9	3698.4	3231.71	47855.6	42701.3	148.188	115.994	277.931	4.72257	12.1356
2A-C2-1	2.68-2.73	2.01-2.06	2.01	Diamict	light yellowish brown	10.9873			Polymodal, v. poorly sorted	Sandy Mud	53.3	46.7		20013.8	64577.3	243099	10666.6	33892.8	19767.9	3774.66	3100.29	51866.1	47664.1	150.54	110.95	287.667	4.8009	10.9321
2A-C3-1	3.11-3.15	2.44-2.48	2.44	Diamict	light grey	13.8364			Polymodal, v. poorly sorted	Sandy Mud	61.6	38.4		16383.4	66418.3	252559	10668.7	24523.1	14091.7	3270.75	2881.26	45334.5	40521.1	116.433	89.9371	254.917	4.33805	8.51123
2A-C3-2	3.93-3.97	3.26-3.30	3.26	Diamict	light yellowish brown	6.72124			Trimodal, v. poorly sorted	Muddy Sand	23.3	76.7		15333.6	63834.9	271446	8729.36	21968.5	12277.4	3740.65	2689.11	36128	30546.7	101.144	73.967	236.33	4.2126	8.16944
2A-C4-1	4.45-4.50	3.78-3.83	3.78	Mudstone and fine-sandy mudstone	pale yellow	11.9494	3.31		Polymodal, v. poorly sorted	Sandy Mud	79.6	20.4		14774.2	62571.2	206945	10759.5	18063.6	11237	3344	3250	54523	53409	115	88	265	5.19408	5.55802
2A-C4-2	4.63-4.67	3.96-4.00	3.96	Mudstone and fine-sandy mudstone	light olive brown	12.4115			Polymodal, v. poorly sorted	Sandy Mud	65.7	34.3		14881.2	82017	232765	8567.11	12854.1	8317	2812	2680	46994	42921	101	83	239	3.26762	4.79631
2A-C4-3	4.72-4.76	4.05-4.09	4.05	Mudstone and fine-sandy mudstone	light grey	19.1505	4.09		Bimodal, poorly sorted	Mud	90.3	9.7		18612.2	64251.7	208790	13674.3	20575.9	12673	3028	3290	67027	69443	119	96	301	5.12049	6.25407
2A-C5-1	5.05-5.10	4.38-4.43	4.38	Diamict	light olive brown	9.52951			Polymodal, v. poorly sorted	Muddy Sand	36.4	63.6		13899.7	75837.8	243297	7273.75	15392.1	9493.01	2723.57	2305.8	38947.9	33936.6	89.3831	70.6048	204.465	3.04044	6.67536
2A-C5-2	5.50-5.55	4.83-4..88	4.83	Breccia	light olive brown	9.31533			Polymodal, v. poorly sorted	Muddy Sand	43.4	56.6		15337.9	67101.4	256738	7764	31824.7	17596.7	4262.08	3340.23	43578.3	38182.9	125.842	89.0966	229.249	4.97788	9.52769
2A-C5-3	5.71-5.75	5.04-5.08	5.04	Mudstone and fine-sandy mudstone	light grey	20.41	3.91		Trimodal, poorly sorted	Muddy Sand	95.9	4.1		21343.3	60969.3	206762	13469.9	20101.8	12410	3019	3199	63787	65307	123	93	298	5.2469	6.28377
2A-C5-4	5.92-5.96	5.25-5.29	5.25	Mudstone and fine-sandy mudstone/Tephra	light olive grey	10.6831			Polymodal, v. poorly sorted	Sandy Mud	60.2	39.8		8578.47	65983.1	267155	24345.5	15733.8	9009	2681	2302	39134	34166	78	56	132	3.48877	6.83482
2A-C6-1	6.40-6.45	5.73-5.78	5.73	Diamict	pale yellow	4.8513			Polymodal, v. poorly sorted	Muddy Sand	46.3	53.7		12531.2	72816.1	246714	8646.03	15169.2	9021.32	3227.47	2547.73	38939.3	33987.6	99.9679	82.3723	256.688	3.49886	5.95402
2A-C6-2	6.85-6.91	6.18-6.24	6.18	Diamict	light yellowish brown	6.31278			Polymodal, v. poorly sorted	Muddy Sand	28.4	71.6		17150.2	60809.3	250164	6685.01	31306.4	18448.2	5707.84	4126.75	47082.1	42846.4	112.905	89.0966	217.742	6.78638	7.58621
2A-C7-1	7.40-7.45	6.73-6.78	6.73	Diamict	pale yellow	6.55702			Polymodal, v. poorly sorted	Muddy Sand	33.3	66.7		16323.7	63757.9	250403	6839.77	32906	19319.1	4770.11	3686.7	48213	43816	119.961	84.8939	253.147	5.78233	8.9256
2A-C9-1	11.08-11.15	10.41-10.48	10.41	Diamict	light brownish grey	5.18626			Polymodal, v. poorly sorted	Muddy Sand	47.2	52.8		20225.7	65331.5	249401	10103.8	34018.1	19181	3698.4	3135.14	45634.3	40645.2	151.716	114.313	304.485	4.79881	10.8506
2A-C9-2	11.82-11.86	11.15-11.19	11.15	Diamict	light grey	6.84547			Polymodal, v. poorly sorted	Sandy Mud	53.8	46.2		20838.9	65896.1	242416	9052.95	26040.1	15187.3	3748.9	3157.04	50646.7	46794.6	131.722	99.183	311.566	4.79093	8.24826
2A-C10-1	12.35-12.40	11.68-11.73	11.68	Diamict	light brownish grey	4.5497			Polymodal, v. poorly sorted	Muddy Sand	38.1	61.9		14894	60048.2	261152	7058.38	37774.4	20167.2	3232.62	2407.35	34679.1	28695.7	130.546	100.024	251.377	4.00904	15.6913
2A-C10-2	12.88-12.94	12.21-12.27	12.21	Diamict	olive grey	6.75589			Polymodal, v. poorly sorted	Sandy Mud	64.5	35.5		17264	66776.7	245086	9799.7	25405.4	15334.6	3605.66	3258.59	51495.9	47680.1	124.666	94.9803	247.836	4.87983	7.79645
2A-C11-1	13.36-13.41	12.69-12.74	12.69	Diamict	olive	6.65034			Polymodal, v. poorly sorted	Sandy Mud	59.5	40.5		16174.3	65396.6	238627	9447.97	28222.6	15985.7	4037.43	3258.59	48054	42511.2	143.483	102.545	295.633	4.98281	8.66099
2A-C11-2	13.70-13.75	13.03-13.08	13.03	Breccia	light olive brown	4.72947			Polymodal, v. poorly sorted	Muddy Sand	37.9	62.1		13275.2	59885.3	260667	7122.23	23377.1	13091.9	3373.8	2831.48	35161.4	29594.2	94.0874	73.1264	203.58	4.72817	8.25614
2A-C11-3	13.85-13.90	13.18-13.23	13.18	Sandstone	yellowish brown	3.98555			Bimodal, poorly sorted	Muddy Sand	16.8	83.2		10872.5	56962.9	270798	4420.87	21620.9	12031.9	2770.91	2205.1	33686.6	28007.7	89.4683	64.283	185.965	3.87112	9.80493
2A-C12-1	14.22-14.26	13.55-13.59	13.55	Cross stratified sandstone	light yellowish brown	4.73751			Unimodal, poorly sorted	Muddy Sand	29.4	70.6		4786.44	52807.3	288790	4929.19	17646.6	9790.8	3655.55	2671.07	27146.8	21247.5	93	72.6314	190.351	5.05814	6.60658
2A-C12-2	14.53-14.58	13.86-13.91	13.86	Sandstone	light olive brown	2.56184			Unimodal, poorly sorted	Sand	8.6	91.4		17924.9	52149.2	259223	3798.39	29436.6	17703.5	2811.64	2165.19	46770.5	42034.1	84.7595	60.1088	212.281	4.15192	13.5954
2A-C13-1	15.00-15.06	14.33-14.39	14.33	Interstratified mudstone and sandstone	yellowish brown	2.9532	0.75		Bimodal, poorly sorted	Sand	9.3	90.7		13894.7	54126.8	274905	3635.2	24559.3	13980.5	2904.32	2227.46	40836.3	35253	79.126	53.4694	170.435	4.11526	11.0257
2A-C13-2	15.51-15.56	14.84-14.89	14.84	Interstratified mudstone and sandstone	yellowish brown	3.96375	1.69		Unimodal, poorly sorted	Muddy Sand	21	79		6128.18	51705.2	288311	4400.16	13976	7490.9	2687.08	2011.61	23614.8	18237.5	77.945	60.8728	142.917	3.89053	6.94766
2A-C14-1	16.06-16.10	15.39-15.43	15.39	Interstratified mudstone and sandstone	dark yellowish brown	4.88028	2.16		Unimodal, poorly sorted	Muddy Sand	32.5	67.5		5072.95	56997.8	285850	5423.33	17063.9	9304.59	3672.35	2787.07	29483.8	23577.4	94.4788	69.9215	190.851	4.88979	6.12252
2A-C14-2	16.55-16.60	15.88-15.93	15.88	Interstratified mudstone and sandstone	yellowish brown	3.97436	0.93		Bimodal, poorly sorted	Muddy Sand	11.7	88.3		12028.4	55078.9	279730	4447.31	21469.3	11640.1	3715.59	2772.08	31545.5	25682.9	82.669	55.9372	161.558	5.03293	7.74483
2A-C15-1	16.92-16.96	16.25-16.29	16.25	Interstratified mudstone and sandstone	yellowish brown	4.98177	1.35		Unimodal, poorly sorted	Muddy Sand	20.5	79.5		5447.52	52419.9	289995	4323.94	15271.5	8480.92	2569.33	1972.62	26828	21092.2	81.2278	65.9527	188.597	3.76311	7.74175
2A-C15-2	17.45-17.50	16.78-16.83	16.78	Interstratified mudstone and sandstone	light olive brown	3.40922	0.9		Bimodal, poorly sorted	Muddy Sand	12.1	87.9		12822	57318.9	260936	4984.11	24082.5	14522.9	2943.24	2275.94	42245.2	36929.4	105.949	71.7966	249.123	3.97067	10.5813
2A-C16-1	17.79-17.85	17.12-17.18	17.12	Interstratified mudstone and sandstone	olive brown	12.8091	2.33		Unimodal, poorly sorted	Muddy Sand	34.7	65.3		5119.79	58746.9	287128	4721.33	15561.6	8801.71	3256.57	2541.36	29684.4	23901.1	88.2911	65.1178	192.983	4.32594	6.12336
2A-C16-2	18.08-18.13	17.41-17.46	17.41	Mudstone and fine-sandy mudstone	dark greyish brown	11.1388	3.52		Bimodal, poorly sorted	Sandy Mud	52.6	47.4		5851.78	54683.9	234499	5702.83	17285	9896.98	4338.6	3585.03	39327.3	34474.5	106.268	78.7585	240.755	6.55592	4.82143
2A-C16-3	18.19-18.26	17.52-17.59	17.52	Mudstone and fine-sandy mudstone	dark greyish brown	11.8328	3.98		Trimodal, poorly sorted	Sandy Mud	69.2	30.8		6110.49	62231.5	227396	6718.54	17299	10014.1	4309.48	3866.14	43178.9	38995.6	112.239	87.2272	248.721	6.21251	4.47449
2A-C16-4	18.40-18.45	17.73-17.78	17.73	Mudstone and fine-sandy mudstone	greyish brown	12.7014	3.98		Polymodal, poorly sorted	Sandy Mud	70.6	29.4		9298.76	57785.8	229706	6322.75	17719.2	10388.7	4136.85	3625.19	43118.8	38957.3	112.239	92.3084	214.201	6.2735	4.8878

## Sheet: FHDP-3A
Sample ID	Drillers Depth (m)	Actual Depth (m)	Top Depth (m)	Facies	Colour (Munsell)	Moisture (%)	Organics (%)	Grain Size	Sample Type	Textural Group	Mud (%)	Sand (%)	XRF Data	Mg	Al	Si	K	Ca (G)	Ca (S)	Ti (G)	Ti (S)	Fe (G)	Fe (S)	Sr (G)	Sr (S)	Ba	Ti/Al	Ca/Ti
3A-C4-1	15.72-15.76	15.05-15.09	15.05	Sandstone	yellowish brown	3.60464			Unimodal, poorly sorted	Muddy Sand	31.2	68.8		8084.77	68600.8	267784	6219.37	11719.2	7269.71	2957.86	2230.05	28550.4	22816.8	80.0506	65.1178	196.492	3.25076	5.25513
3A-C4-2	15.89-15.94	15.22-15.27	15.22	Sandstone	brown	3.55								8193.07	68392.9	273552	6565.07	15036.5	8736.09	3045.59	2400.67	32057.2	26214.9	85.9367	66.7875	226.316	3.51011	6.26345
3A-C4-3	16.05-16.10	15.38- 15.43	15.38	Mudstone and fine-sandy mudstone	dark olive brown	6.85619			Polymodal, v. poorly sorted	Sandy Mud	68.5	31.5		3693.56	59146.1	240106	6594.14	16268.8	9380	3106.17	2492.46	26426.8	20984	101.24	88.4935	235.088	4.21408	6.52718
3A-C4-4	16.40-16.45	15.73-15.78	15.73	Mudstone and fine-sandy mudstone	very dark greyish brown	5.05769	13.23		Bimodal, poorly sorted	Sandy Mud	79.5	20.5		3602.79	48664.6	231826	6957.98	11693.5	6540.88	3211.31	2629.29	25755.3	20672.4	105.074	90.6146	229.249	5.40289	4.4474
3A-C5-1	16.51-16.55	15.84-15.88	15.84	Mudstone and fine-sandy mudstone	dark greyish brown	7.93703	13.27		Trimodal, poorly sorted	Sandy Mud	77.1	22.9		3982.03	51506.4	220859	7105.58	10485.9	6019.12	2972.13	2543.96	29241.7	24215.9	96.7162	85.5334	235.445	4.93911	4.12187
3A-C5-2	16.69-16.73	16.02-16.06	16.02	Mudstone and fine-sandy mudstone	greyish brown	5.406	5.38		Trimodal, v. poorly sorted	Sandy Mud	53.9	46.1		0	51521.5	253418	12250.8	13823.3	7177.35	2921.17	2216.68	23107.7	18087.4	99.1043	77.9117	315.991	4.30243	6.23605
3A-C5-3	16.81-16.86	16.14-16.19	16.14	Diamict	pale yellow	10.3285			Polymodal, v. poorly sorted	Sandy Mud	63.6	36.4		18989.5	65663.1	252787	8416.6	30550.4	17794.6	4359.97	3686.7	53844.2	50424.6	127.018	93.2993	229.249	5.61456	8.28665
3A-C5-4	17.06-17.10	16.39-16.43	16.39	Diamict	light olive grey	4.62912			Polymodal, v. poorly sorted	Muddy Sand	26.7	73.3		18045	58927.7	277412	5384.15	41278	22825.1	5431.68	3976.41	41815.8	36266.8	123.49	86.575	187.648	6.74795	10.3807
3A-C6-1	17.81-17.86	17.14-17.19	17.14	Diamict	grey	7.60344			Trimodal, poorly sorted	Muddy Sand	23.8	76.2		12494.2	57100.5	307880	5087.62	41425.2	21124.6	3742.71	2794.64	31801.7	25623	116.433	86.575	192.958	4.89425	14.8231
3A-C7-1	18.60-18.65	17.93-17.98	17.93	Sandstone	grey	11.9996			Unimodal, poorly sorted	Muddy Sand	24.3	75.7		12477.4	53321.2	292526	6469.22	29870.3	15717.1	3258.66	2313.86	28595.3	22717.6	116.544	85.989	193.86	4.33947	12.9093
3A-C7-2	18.93-18.98	18.26-18.31	18.26	Sandstone	grey	12.892			Unimodal, poorly sorted	Muddy Sand	14.7	85.3		11221.3	48955.8	295287	5823.05	27754.9	14857.3	3951.13	2617.19	28505.4	22563.3	93	67.6224	168.421	5.34602	10.6048
3A-C7-3	19.07-19.14	18.4-18.47	18.4	Mudstone and fine-sandy mudstone	light grey	11.7134			Polymodal, v. poorly sorted	Sandy Mud	51.1	48.9		15300.3	59817.9	261642	8074.95	29535.9	17354.1	3599.15	2922.51	44966.8	39875.5	116.544	94.3374	250.001	4.88567	10.1064
3A-C8-1	19.69-19.74	19.02-19.07	19.02	Diamict	grey	8.15262			Polymodal, v. poorly sorted	Muddy Sand	29.1	70.9		16143	62349.2	281254	7504.27	39414.8	21116.4	4234.25	3134.14	39386.4	33284.2	116.433	84.8939	204.465	5.02675	12.5759
3A-C9-1	20.55-20.60	19.88-19.93	19.88	Diamict	olive grey	7.38866			Polymodal, v. poorly sorted	Muddy Sand	27.2	72.8		10448.6	62993.9	281295	5525.93	22171.4	12273.5	4736.1	3494.55	38245.9	32687.9	90.5592	65.5616	190.303	5.54744	6.34458
3A-C9-2	21.06-21.11	20.39-20.44	20.39	Diamict	olive grey	9.90087			Polymodal, v. poorly sorted	Muddy Sand	40.9	59.1		9375.99	67151.8	267587	6384.15	21801.4	12210.8	4705.18	3347.2	37578	31896.4	98.7918	78.1696	208.891	4.98452	6.51332
3A-C10-1	21.47-21.51	20.8-20.84	20.8	Diamict	olive grey	8.04317			Polymodal, v. poorly sorted	Muddy Sand	40.4	59.6		11748.8	70611.8	256471	7883.05	19171.2	11089	3705.62	3120.2	42230.8	37391.4	90.5592	68.9238	230.134	4.41881	6.14422
3A-C10-2	22.00-22.05	21.33-21.38	21.33	Diamict	light olive grey	10.5671			Polymodal, v. poorly sorted	Muddy Sand	43.2	56.8		12076	70164.6	254115	7967.47	20535	11917.6	3704.59	3243.66	45838	41297.6	102.32	75.648	335.464	4.62292	6.33083
3A-C11-1	22.28-22.32	21.61-21.65	21.61	Diamict	light grey	5.79738			Bimodal, v. poorly sorted	Muddy Sand	22.7	77.3		21560.1	55481.5	281231	4756.45	41482.9	22257.7	3589.17	2721.96	38704.6	32364.7	92.9113	65.5616	179.681	4.90607	15.2401
3A-C11-2	22.97-23.01	22.3-22.34	22.3	Diamict	olive grey	10.0321			Trimodal, v. poorly sorted	Muddy Sand	20	80		16778.9	60975.1	262479	8229.37	35080.6	19746.1	3450.06	2850.39	44110.7	39066.4	102.32	80.6912	236.33	4.67469	12.3073
3A-C12-1	23.39-23.44	22.72-22.77	22.72	Cross Cross stratified sandstone	light grey	15.7883			Bimodal, poorly sorted	Muddy Sand	19	81		0	52066.9	328582	7654.43	25872.1	13309	3288	2051	22214	16984	122	92	229	3.93916	12.6144
3A-C12-2	23.70-23.75	23.03-23.08	23.03	Diamict	olive grey	10.8928			Polymodal, v. poorly sorted	Sandy Mud	64.5	35.5		12431.6	69588.1	268175	8361.4	21900.9	12597.9	3542.8	2997.74	45363.3	40637.2	99.9679	72.2859	254.917	4.30784	7.30578
3A-C13-1	24.61-24.67	23.94-24	23.94	Diamict	olive grey	9.83681			Polymodal, v. poorly sorted	Muddy Sand	43.3	56.7		6855.24	78697.7	249878	7214.23	18587.3	10874	3977.66	3295.43	43711.7	38958.3	97.6157	74.8075	321.302	4.18745	5.64032
3A-C14-1	25.00-25.02	24.33-24.35	24.33	Diamict	olive	9.84576			Polymodal, v. poorly sorted	Muddy Sand	31.7	68.3		9348.96	83614.7	251744	6397.13	18478.8	11364.7	5266.8	4302.97	52327	48414.5	92.9113	68.9238	256.688	5.14619	4.29444
3A-C14-2	25.27-25.32	24.6-24.65	24.6	Diamict	olive	9.29246			Bimodal, poorly sorted	Muddy Sand	27.6	72.4		11268	77880.3	253248	5610.34	18467.9	11417.2	4782.47	3833.05	50409.8	46610.5	91.7353	67.2427	237.215	4.92172	4.81807
3A-C14-3	25.78-25.83	25.11-25.16	25.11	Diamict	olive	7.75298			Polymodal, v. poorly sorted	Muddy Sand	33.8	66.2		9788.53	78518	248740	6012.94	19717.3	11975.9	4432.11	3697.65	49256.5	45020.6	94.0874	72.2859	201.81	4.7093	5.3324
3A-C15-1	26.18-26.23	25.51-25.56	25.51	Diamict	grey	7.35829			Polymodal, v. poorly sorted	Muddy Sand	25.3	74.7		11266.6	81039.2	261366	6061.64	28706.1	16960.7	7102.09	5200	52215	48131.3	95.2635	67.2427	249.607	6.41665	5.52039
3A-C16-1	27.14-27.19	26.47-26.52	26.47	Diamict	olive grey	8.13084			Polymodal, v. poorly sorted	Muddy Sand	45.8	54.2		7210.88	81496.3	269561	7027	17428.4	10291.5	4147.69	3272.53	39168.7	33726.4	97.6157	74.8075	282.356	4.01556	5.32566
3A-C16-2	27.76-27.80	27.09-27.13	27.09	Mudstone and fine-sandy mudstone/Tephra	very dark greyish brown	11.9769	3.18		Polymodal, poorly sorted	Mud	91	9		5376.99	68773	226690	6253.87	18847.9	10581.9	3408.9	2786.91	34728.1	29333.6	99.1043	73.6773	262.884	4.05233	6.76301
3A-C17-1	27.88-27.92	27.21-27.25	27.21	Sandstone/Tephra	dark greyish brown	10.6007	3.1		Polymodal, v. poorly sorted	Muddy Sand	32.2	67.8		6391.24	63927.1	233562	6092.06	18713.6	10821.4	3670.96	3047.93	41212.3	36525.4	94.3282	77.0648	226.593	4.76783	6.13977
3A-C17-2	28.30-28.35	27.63-27.68	27.63	Sandstone	dark greyish brown	10.616			Unimodal, poorly sorted	Muddy Sand	18.2	81.8		16873.3	64727.5	282827	6885.82	23507.5	13334	3585.69	2695	40896.5	35128	89.5521	63	214	4.16361	8.72263
3A-C17-3	28.80-28.85	28.13-28.18	28.13	Cross Cross stratified sandstone	light brownish grey	12.2542			Unimodal, poorly sorted	Muddy Sand	25.5	74.5		8553.51	63105.5	284516	5695.18	33631.7	18066.1	3925.75	2795.95	32824.8	26593.4	133.731	99.9302	186.762	4.43059	12.0288
3A-C18-1	29.21-29.26	28.54-28.59	28.54	Cross Cross stratified sandstone	olive grey	12.9157			Bimodal, poorly sorted	Muddy Sand	17.7	82.3		10111.6	58383.6	286666	4985.6	28948.4	15479	3426.58	2418.47	30857.1	24875	108.657	82.9928	188.533	4.14238	11.9697
3A-C18-2	29.73-29.77	29.06-29.1	29.06	Graded beds	grey	11.9243			Unimodal, poorly sorted	Sand	6.4	93.6		8437.38	46535.5	256853	4975.76	26975.1	15243	2934	2012	39033	33736	101	69	214	4.32358	13.4071
3A-C19-1	30.19-30.23	29.52-29.56	29.52	Graded beds	olive grey	13.6506			Bimodal, poorly sorted	Muddy Sand	25.6	74.4		7745.05	50405.6	264795	5809.98	27688.7	14561.4	3201.95	2227.72	30886.1	25314.4	122.985	89.7678	204.465	4.41959	12.4292
3A-C19-2	30.23-30.29	29.56-29.62	29.56	Graded beds	light olive grey	14.4355			Bimodal, poorly sorted	Sand	4.9	95.1		6363.32	38286.3	287377	4063.92	26690.7	14559.4	3242.51	1998.82	32748.6	26823.1	94.3282	66.9024	196.499	5.22073	13.3532
3A-C19-3	30.29-30.33	29.62-29.66	29.62	Graded beds	dark grey	13.0862			Unimodal, poorly sorted	Sand	4.4	95.6		9458.98	42557.6	252373	6603.74	33055.8	19923.7	3964.23	2688.52	47963.9	43755.5	112.239	77.9117	154.898	6.31738	12.2951
3A-C20-1	31.00-31.06	30.33-30.39	30.33	Diamict	olive grey	9.08293			Polymodal, v. poorly sorted	Muddy Sand	28	72		13876.9	65008.2	269075	5739.05	39452.4	21996.2	3395.48	2604.22	44758.2	39376.5	134.202	98.5116	214.036	4.00598	15.1494
3A-C20-2	31.56-31.61	30.89-30.94	30.89	Diamict	olive grey	9.20604			Polymodal, v. poorly sorted	Muddy Sand	31.8	68.2		14525.6	64856.6	261959	6971.8	25907.8	14619.3	4097.2	3021.64	39259.4	33479.3	96.4396	71.4454	205.35	4.65895	8.57409
3A-C21-1	32.18-32.23	31.51-31.56	31.51	Diamict	grey	9.79443			Unimodal, v. poorly sorted	Muddy Sand	23	77		12046.1	64574.3	275362	7010.76	23463.6	13039.9	3696.34	2668.2	33997.4	27918.3	91.7353	68.9238	200.924	4.13198	8.79381
3A-C21-2	32.64-32.69	31.97-32.02	31.97	Sandstone	olive grey	11.3078	0.99		Bimodal, poorly sorted	Muddy Sand	16.4	83.6		6451.51	58768.7	265332	6472.54	21137.9	11388	3596	2590	30975	25217	103	78	181	4.40711	8.16134
3A-C22-1	32.76-32.81	32.09-32.14	32.09	Cross Cross stratified sandstone	dark grey	10.2418			Bimodal, poorly sorted	Muddy Sand	30.1	69.9		5118.29	71653.1	270570	7221.47	15066.1	8623	3450	2528	28990	23171	104	79	235	3.52811	5.95969
3A-C22-2	32.90-32.95	32.23-32.28	32.23	Mudstone and fine-sandy mudstone	dark olive grey	13.0195	5		Trimodal, v. poorly sorted	Sandy Mud	64.2	35.8		0	63086.3	247330	8238.27	15395.1	8360	3545	2898	30851	25386	109	86	254	4.5937	5.3123
3A-C22-3	33.00-33.01	32.33-32.34	32.33	Interstratified mudstone and sandstone	grey	14.1866	1.1		Bimodal, poorly sorted	Muddy Sand	17.6	82.4		4315.25	58381.1	303292	6253.83	13503.2	8360.38	3081.11	2414.64	23280.4	20497.9	85.9367	69.2921	255.264	4.13599	5.59223
3A-C22-4	33.20-33.25	32.53-32.58	32.53	Interstratified mudstone and sandstone	olive grey	12.1412	0.95		Bimodal, poorly sorted	Muddy Sand	14.6	85.4		3956.59	64596.3	277197	6518.76	11259.9	7612.36	3065.44	2175.17	22840.7	17885.5	88.2911	70.9618	229.825	3.36733	5.17656
3A-C22-5	33.62-33.67	32.95-33	32.95	Sandstone	light olive grey	12.2745			Bimodal, poorly sorted	Sand	9.7	90.3		14073.1	60709.3	295503	5250.19	20880.3	11140	2448	1813	30571	24409	73	53	187	2.98636	11.517
3A-C23-1	33.72-33.77	33.05-33.1	33.05	Interstratified mudstone and sandstone	dark grey	10.9839	1.87		Unimodal, poorly sorted	Muddy Sand	35	65		3956.59	64596.3	277197	6518.76	11259.9	6592.17	3065	2241.02	22841	17581.8	88	68.4572	237.72	3.46927	5.02444
3A-C23-2	34.15-34.20	33.48-33.53	33.58	Cross Cross stratified sandstone	grey	13.6576			Bimodal, poorly sorted	Sand	10	90		7155.61	51414.7	302234	5082.91	14550.1	8266	3337	2137	25650	19951	60	43	173	4.1564	6.80864
3A-C23-3	34.57-34.62	33.9-33.95	33.9	Interstratified mudstone and sandstone	dark grey	12.4713	2.16		Unimodal, poorly sorted	Muddy Sand	36.5	63.5		3448.83	68917.6	287939	7738.94	12292.5	7106.88	3704	2637.14	23701	18302.3	99	72.6314	235.965	3.82651	4.66131
3A-C24-1	34.92-34.96	34.25-34.29	34.25	Sandstone	grey	13.0344	1.13		Unimodal, poorly sorted	Muddy Sand	16.5	83.5		4045.24	50100.1	289468	6083.31	14881.8	7709	2138	1549	19492	14548	81	64	218	3.09181	9.60733
3A-C24-2	35.42-35.46	34.75-34.79	34.75	Interstratified mudstone and sandstone	grey	11.05	1.71		Bimodal, poorly sorted	Muddy Sand	29	71		4183.04	65492.7	290807	7112.16	13079.3	7546.75	3579	2697.01	26089	20512	95	75.6797	225.439	4.11803	4.84957
3A-C25-1	35.71-35.75	35.04-35.08	35.04	graded beds	grey	15.6379	1.92		Bimodal, poorly sorted	Muddy Sand	28.9	71.1		0	62871.6	265767	7402.97	14093.9	7710	3454	2578	26015	20552	99	80	261	4.10042	5.46699
3A-C25-2	36.03-36.09	35.36-35.42	35.36	Interstratified mudstone and sandstone	greyish brown	14.5605	1.77		Polymodal, v. poorly sorted	Muddy Sand	39.4	60.6		6910.31	76887.5	286650	7654.94	13452.1	7806.78	3798.64	2968.41	31335.1	2106125	95.3544	75.136	229.825	3.86072	4.53175
3A-C25-3	36.47-36.51	35.8-35.84	35.8	Diamict	grey	6.48771			Polymodal, v. poorly sorted	Muddy Sand	37.1	62.9		9945.01	73816.1	259898	6708.82	18895.7	11044.7	4059.07	3235.69	44076.6	38929.3	104.672	76.4886	227.478	4.38345	5.83976
3A-C26-1	37.34-37.39	36.67-36.72	36.67	Diamict	dark grey	10.5672			Polymodal, v. poorly sorted	Muddy Sand	45.2	54.8		0	78584.1	249651	9489.1	9682.09	6039.02	3959.12	3142.1	32737.3	27249.9	92.9113	71.4454	289.437	3.9984	3.0814
3A-C27-1	37.83-37.86	37.16-37.19	37.16	Mudstone and fine-sandy mudstone	dark grey	15.1284	7.81		Polymodal, v. poorly sorted	Sandy Mud	59.6	40.4		0	68366.7	254865	9168.7	11690.5	6724	3733	2904	30366	24585	94	75	218	4.24768	4.02567
3A-C27-2	38.01-38.06	37.34-37.39	37.34	Diamict	olive grey	21.7111			Polymodal, v. poorly sorted	Sandy Mud	58.1	41.9		16043.5	74253.4	247018	10181.7	14141.6	8919.69	3394.41	3310.36	57367.2	55674.4	98.7918	77.3291	270.85	4.45819	4.27194
3A-C28-1	38.50-38.55	37.83-37.88	37.83	Diamict	grey	7.99443			Polymodal, v. poorly sorted	Muddy Sand	36.7	63.3		15933.9	66823.1	257944	7247.77	25076.2	14878.5	3803.51	3172.97	50261.5	46094.2	107.024	76.4886	206.235	4.74831	7.90306
3A-C29-1	39.61-39-66	38.94-38.99	38.94	Diamict	grey	7.64213			Polymodal, v. poorly sorted	Muddy Sand	32.7	67.3		14941	63315.7	268735	7604.91	27541.2	15774.2	3195.53	2740.88	46549.7	41938.9	109.377	86.575	215.087	4.32891	10.0483
3A-C30-1	40.45-40.49	39.78-39.82	39.78	Diamict	grey	7.34528			Polymodal, v. poorly sorted	Muddy Sand	31.1	68.9		18956.8	67100.5	263689	7794.31	29898.8	17000.1	3859.16	3215.78	46961.5	42393.2	118.785	87.4155	206.235	4.79248	9.29753
3A-C30-2	41.00-41.05	40.33-40.38	40.33	Diamict	olive grey	10.0148			Polymodal, v. poorly sorted	Muddy Sand	32.3	67.7		7764.25	72716.4	272301	8403.61	13202.6	7793	3628.33	2934.02	35863.4	30321.6	89.3831	72.2859	215.087	4.03489	4.49982
3A-C31-1	41.75-41.80	41.08-41.13	41.08	Diamict	olive grey	10.3396			Polymodal, v. poorly sorted	Muddy Sand	31.6	68.4		6370.15	65722.4	288787	7422.02	14542.5	8255.44	3265.6	2464.1	29520.6	23741	91.7353	73.1264	216.857	3.74926	5.90176
3A-C32-1	42.54-42.58	41.87-41.91	41.87	Diamict	grey	14.0725			Trimodal, poorly sorted	Mud	93.1	6.9		16170.1	71640.4	244796	13312.7	19716.3	12457.8	3316.09	3668.78	73585.4	77149.2	109.377	82.3723	290.323	5.1211	5.37409
3A-C32-2	43.06-43.09	42.39-42.42	42.39	Diamict	olive grey	13.1176			Polymodal, v. poorly sorted	Muddy Sand	38.1	61.9		9587.95	71779.6	266504	8229.37	16425.6	9769.7	3884.92	3313.35	42382.3	37166.3	96.4396	71.4454	224.823	4.616	4.95742
3A-C33-1	43.30-43.35	42.63-42.68	42.63	Diamict	olive grey	9.81744			Polymodal, v. poorly sorted	Muddy Sand	30.2	69.8		5375.49	75412.8	268975	7134.33	16654.6	9383.62	3263.62	2733.11	35610.1	30085.2	90.9359	67.4537	210.38	3.6242	6.09363
3A-C33-2	43.72-43.76	43.05-43.09	43.05	Diamict	greyish brown	13.2508			Polymodal, v. poorly sorted	Muddy Sand	46.8	53.2		4986.72	75419.7	272837	7658.24	14559	8471.13	3179.2	2751.1	38786.4	33439.7	95.6598	74.0345	245.888	3.64772	5.29208
3A-C34-1	44.76-44.81	44.09-44.14	44.09	Diamict	light brownish grey	12.9335			Polymodal, v. poorly sorted	Sandy Mud	51.9	48.1		5056.88	74116	271125	8858.18	13281.2	7794.73	3465.41	2988.93	39720.6	34099.2	94.4788	75.6797	268.967	4.03278	4.44346
3A-C35-1	45.25-45.30	44.58-44.63	44.58	Diamict	olive grey	7.0681			Bimodal, v. poorly sorted	Muddy Sand	21.8	78.2		10286.2	67588.9	281905	5592.61	21609.5	12255.1	3619.84	2776.08	42514.7	36927.2	86.2119	63.3407	196.178	4.1073	7.78417
3A-C35-2	45.60-45.64	44.93-44.97	44.93	Sandstone	light olive grey	11.0642			Bimodal, v. poorly sorted	Muddy Sand	24.9	75.1		7842.06	60582.2	299829	6194.83	17848	9694.18	4054.7	2742.74	28401.8	22755.6	84.776	61.8212	216.857	4.5273	6.50735
3A-C35-3	45.64-45.66	44.97-44.99	44.97	Sandstone	olive grey	15.5587			Bimodal, poorly sorted	Sand	7.1	92.9		9830.87	48814.8	307148	4234.48	23938.7	12818	3533.69	2370.28	29572.5	23762.4	72.8357	55.8931	139.851	4.85566	10.0995
3A-C35-4	45.76-45.80	45.09-45.13	45.09	Mudstone and fine-sandy mudstone	light greenish grey	32.7683	4.29		Bimodal, poorly sorted	Mud	87.1	12.9		16780.7	64082.3	223132	12566.8	19812.3	12523	2837	3388	86943	99650	123	92	328	5.28695	5.84779
3A-C35-5	45.80-45.83	45.13-45.16	45.13	Sandstone	grey	23.4807			Polymodal, v. poorly sorted	Muddy Sand	45.8	54.2		21460.9	74886	241492	10526.6	15551.2	9912	2947	3236	71568	75037	97	74	290	4.32123	4.80569
3A-C36-1	46.09-46.14	45.42-45.47	45.42	Diamict	grey	15.4544			Bimodal, v. poorly sorted	Muddy Sand	22	78		14384.3	60791.2	254728	6006.17	23869.6	13391.4	2909.46	2312.4	39247.7	33568.8	66.1352	47.7111	202.391	3.80384	10.3224
3A-C36-2	46.14-46.19	45.47-45.52	45.47	Massive Mudstone	olive grey	15.1218	3.04		Polymodal, v. poorly sorted	Sandy Mud	51.2	48.8		14156.9	65983.6	207485	9042.97	15186.2	9847	2899	2995	60101	61097	93	69	232	4.53901	5.0705
3A-C36-3	46.40-46.45	45.73-45.78	45.73	Diamict	light olive grey	8.19264			Polymodal, v. poorly sorted	Muddy Sand	32.9	67.1		7849.85	68564.7	273936	6004.02	16661.7	9455.29	3974	3005.92	36437.5	30852.8	76.764	57.5824	182.862	4.38407	5.54295
3A-C36-4	46.55-46.60	45.88-45.93	45.88	Sandstone	olive grey	12.5673	0.64		Unimodal, poorly sorted	Sand	9.9	90.1		10705.5	50546.7	260453	4827.07	20191.8	11218	2724	2036	34666	28846	80	58	185	4.02796	9.91741
3A-C37-1	47.51-47.56	46.84-46.89	46.84	Diamict	olive grey	6.35311			Polymodal, v. poorly sorted	Muddy Sand	30.1	69.9		10129.8	71324.1	278811	6321.15	16854.7	9749.8	4030.63	3048.89	40316.4	35180.9	88.5739	62.518	202.391	4.2747	5.52813
3A-C38-1	48.43-48.48	47.76-47.81	47.76	Diamict	light olive grey	6.77738			Polymodal, v. poorly sorted	Muddy Sand	28.8	71.2		11204.1	69123.7	256985	6305.08	18277.8	10569.5	3989.44	3222.77	43258.9	38329.3	89.7549	69.0989	206.83	4.66233	5.67144
3A-C39-1	49.39-49.44	48.72-48.77	48.72	Diamict	light olive grey	7.28456			Bimodal, v. poorly sorted	Muddy Sand	19.9	80.1		11500.7	65977.1	273049	5624.75	20750.2	12021	3132.87	2424.32	41977.7	36999.3	93.2978	65.8085	217.482	3.67449	8.55915
3A-C40-1	50.02-50.06	49.35-49.39	49.35	Diamict	dark greyish brown	12.3068			Polymodal, v. poorly sorted	Sandy Mud	64.1	35.9		3620.2	78421	266091	7892.87	11571.7	7207.18	3639.4	3214.78	39651.2	34461	96.8408	74.0345	260.978	4.09938	3.59952
3A-C40-2	50.20-50.24	49.53-49.57	49.53	Interstratified mudstone and sandstone	dark greyish brown	13.4022	3.92		Polymodal, poorly sorted	Sandy Mud	71.2	28.8		0	72931	269981	9564.36	7099.76	4717.99	4274.9	3347.56	30726.4	25303	105.949	87.6586	264.036	4.59004	2.12087
3A-C40-3	50.38-50.41	49.71-49.74	49.71	Interstratified mudstone and sandstone	grey	17.6001			Polymodal, v. poorly sorted	Sandy Mud	79.7	20.3		9367.53	82288.6	232312	12815.7	7924.9	5637.1	3194.95	3217.85	58290.4	57365.2	90.6455	71.7966	292.983	3.91045	2.46279
3A-C40-4	50.51-50.54	49.84-49.87	49.84	Interstratified mudstone and sandstone	pale olive	15.1944			Unimodal, poorly sorted	Muddy Sand	18.4	81.6		4143.66	59940.5	280717	4658.87	15588.2	8776.43	2517.11	1598.45	25305.6	19808.5	76.519	58.4391	154.386	2.66673	9.75207
3A-C40-5	50.65-50.68	49.98-50.01	49.98	Interstratified mudstone and sandstone	grey	17.8775			Polymodal, v. poorly sorted	Sandy Mud	70	30		12751.7	76912	251539	14337.4	10605.9	7021.83	2992.33	3019.29	53627	50369.5	98.886	75.9708	294.738	3.92565	3.5127
3A-C41-1	50.76-50.80	50.09-50.13	50.09	Interstratified mudstone and sandstone	olive grey	24.0561			Polymodal, v. poorly sorted	Sandy Mud	83.6	16.4		13449.3	64872.9	238948	13972.3	9348	6741.87	2928.62	3353.55	81512	90985.6	81.2278	65.1178	264.036	5.16942	2.78749
3A-C41-2	50.87-50.90	50.2-50.23	50.2	Interstratified mudstone and sandstone	dark grey	12.8562			Polymodal, v. poorly sorted	Sandy Mud	57.3	42.7		5119.79	78450.8	254482	11494.3	5795.66	4323.33	3706.73	3218.85	38740.4	33574.3	77.6962	65.9527	256.141	4.10302	1.80054
3A-C41-3	50.98-51.01	50.31-50.34	50.31	Interstratified mudstone and sandstone	dark olive grey	1.65978			Unimodal, poorly sorted	Muddy Sand	14.9	85.1		5285.76	65366.2	268377	5309.35	17549.3	10309.9	4731.32	3240.8	30039.6	24190.7	80.0506	60.9436	166.667	4.95792	5.4151
3A-C41-4	51.10-51.13	50.43-50.46	50.43	Interstratified mudstone and sandstone	grey	16.2514			Bimodal, v. poorly sorted	Muddy Sand	34.3	65.7		11611	68747	261517	10572.4	14373.6	8790.53	3245.08	2670.07	44289.6	39620	76.519	53.43	195.614	3.88391	5.38323
						63.6
						26.7
						23.8
						29.1
						27.2
						40.9
						40.4
						43.2
						22.7
						20
						64.5
						43.3
						31.7
						27.6
						33.8
						25.3
						45.8
						31.8
						23
						37.1
						45.2
						58.1
						36.7
						32.7
						31.1
						32.3
						31.6
						93.1
						38.1
						30.2
						46.8
						51.9
						21.8
						22
						32.9
						30.1
						28.8
						19.9
						64.1
						37.1513
